# Supplementary material for: Heavy Metals in Coal Fire Sponges in the Wuda Coalfield, Inner Mongolia
Source: Research Square preprint supplement (doi:10.21203/rs.3.rs-7533939/v1), 2025-09-18
Supplement: Supplementary file 1 [file 97c970afc20ea7c78c4e4ba0.docx]

S1 The concentrations of heavy metals in the sponge bodies of the old backfilled area

| NO. | Hg(ng/g) | As（μg/g） | Cd（μg/g） | Cr（μg/g） | Zn（μg/g） |
| --- | --- | --- | --- | --- | --- |
| H-01 | 6113 | 12.43 | 10.9 | 182.52 | 763 |
| H-02 | 22727 | 45.93 | 9.89 | 213.84 | 1254 |
| H-03 | 34242 | 63.09 | 22.36 | 221.64 | 839 |
| H-04 | 13513 | 16.5 | 10.67 | 130.08 | 487 |
| H-05 | 4636 | 12.6 | 8.53 | 135 | 893 |
| H-06 | 5620 | 55.41 | 12.45 | 126.24 | 942 |
| H-07 | 22146 | 39.63 | 11.5 | 128.76 | 1058 |
| H-08 | 9718 | 39.12 | 9.37 | 117.96 | 705 |
| H-09 | 22756 | 45.25 | 13.34 | 277.2 | 834 |
| H-10 | 25203 | 52.66 | 16.35 | 290.4 | 1125 |
| H-11 | 4860 | 12.27 | 7.74 | 114 | 530 |
| H-12 | 35310 | 55.65 | 14.43 | 291.6 | 993 |
| H-13 | 7291 | 12.61 | 8.98 | 198 | 705 |
| H-14 | 38343 | 50 | 20.46 | 294 | 1260 |
| H-15 | 25877 | 30.36 | 16.84 | 211.2 | 976 |
| H-16 | 9821 | 12.91 | 8.05 | 104.4 | 437 |
| H-17 | 15770 | 38.82 | 11.6 | 223.2 | 690 |
| H-18 | 5450 | 49.3 | 11.4 | 114 | 409 |
| H-19 | 4417 | 11.68 | 7.78 | 214.8 | 905 |
| H-20 | 18407 | 32.99 | 6.9 | 127.2 | 451 |
| H-21 | 3950 | 24.34 | 11.84 | 106.8 | 382 |
| H-22 | 6409 | 19.44 | 10.03 | 140.4 | 521 |
| H-23 | 21470 | 23.14 | 12.04 | 211.2 | 1145 |
| H-24 | 14503 | 26.53 | 5.54 | 177.6 | 1050 |
| H-25 | 38470 | 41.56 | 18.93 | 236.4 | 865 |
| H-26 | 23933 | 30.68 | 15.73 | 216 | 939 |
| H-27 | 33355 | 45.03 | 14.94 | 194.4 | 1005 |
| H-28 | 28007 | 29.29 | 10.59 | 157.2 | 580 |
| H-29 | 8483 | 11.47 | 7.04 | 187.2 | 672 |
| H-30 | 21977 | 27.23 | 11.76 | 225.6 | 874 |
| H-31 | 3697 | 6.12 | 8.94 | 250.8 | 762 |
| H-32 | 8709 | 7.55 | 10.04 | 126 | 505 |
| H-33 | 10253 | 19.11 | 9.09 | 192 | 681 |
| min | 3697 | 6.12 | 5.54 | 104.4 | 382 |
| max | 38470 | 63.09 | 22.36 | 294 | 1260 |
| mean | 16831.39 | 30.32 | 11.70 | 185.99 | 795.06 |
| SD | 10975.21 | 16.12 | 3.91 | 57.09 | 245.03 |
| RSD | 0.65 | 0.53 | 0.33 | 0.31 | 0.31 |

S2 The concentrations of heavy metals in the surface soil of the old backfilled area

| NO. | Hg(ng/g) | As（μg/g） | Cd（μg/g） | Cr（μg/g） | Zn（μg/g） |
| --- | --- | --- | --- | --- | --- |
| LT-01 | 2086 | 10.49 | 1.09 | 62.79 | 228.90 |
| LT-02 | 2505 | 11.01 | 3.13 | 99.03 | 346.20 |
| LT-03 | 4313 | 16.03 | 2.24 | 89.5 | 161.70 |
| LT-04 | 2837 | 14.25 | 1.07 | 114.50 | 146.1 |
| LT-05 | 2159 | 8.47 | 0.82 | 56.93 | 267.9 |
| LT-06 | 3957 | 12.63 | 3.25 | 100.67 | 282.75 |
| LT-07 | 1904 | 6.56 | 1.15 | 72.80 | 317.4 |
| LT-08 | 2947 | 13.48 | 2.94 | 118.65 | 286.5 |
| LT-09 | 2845 | 5.58 | 6.53 | 107.82 | 310.2 |
| LT-10 | 2761 | 9.53 | 1.64 | 49.16 | 187.5 |
| LT-11 | 1872 | 7.36 | 0.77 | 99.35 | 176.25 |
| LT-12 | 2813 | 8.18 | 1.76 | 79.59 | 297.9 |
| LT-13 | 2217 | 6.08 | 0.90 | 55.04 | 158.4 |
| LT-14 | 1870 | 9.74 | 2.15 | 81.87 | 228.9 |
| LT-15 | 3571 | 12.64 | 4.68 | 128.34 | 397.8 |
| LT-16 | 1853 | 6.12 | 0.61 | 49.17 | 128.1 |
| LT-17 | 2014 | 6.82 | 0.25 | 62.92 | 207 |
| LT-18 | 1438 | 7.25 | 1.14 | 44.57 | 117.3 |
| LT-19 | 1878 | 4.93 | 0.89 | 59.83 | 151.5 |
| LT-20 | 2875 | 5.92 | 0.72 | 75.67 | 135.3 |
| min | 1438 | 4.93 | 0.25 | 44.57 | 117.3 |
| max | 4313 | 16.03 | 6.53 | 128.34 | 397.8 |
| mean | 2535.75 | 9.15 | 1.89 | 80.41 | 226.68 |
| SD | 740.08 | 3.18 | 1.53 | 24.93 | 79.94 |
| RSD | 0.29 | 0.35 | 0.81 | 0.31 | 0.35 |

S3 The concentrations of heavy metals in the surface soil of the newly backfilled area

| NO | Hg(ng/g) | As（μg/g） | Cd（μg/g） | Cr（μg/g） | Zn（μg/g） |
| --- | --- | --- | --- | --- | --- |
| XT-1 | 64 | 1.34 | 0.109 | 42.79 | 53.7 |
| XT-2 | 59 | 1.97 | 0.142 | 38.25 | 40.9 |
| XT-3 | 73 | 1.29 | 0.154 | 50.5 | 67.8 |
| XT-4 | 53 | 1.93 | 0.167 | 54.4 | 57.2 |
| XT-5 | 84 | 1.36 | 0.265 | 75.13 | 58.4 |
| XT-6 | 66 | 1.77 | 0.163 | 60.4 | 55.1 |
| XT-7 | 95 | 1.12 | 0.115 | 72.8 | 61.8 |
| XT-8 | 70 | 1.32 | 0.187 | 40.65 | 48.1 |
| XT-9 | 71 | 1.89 | 0.136 | 38.1 | 76.8 |
| XT-10 | 57 | 0.98 | 0.119 | 39.19 | 75 |
| XT-11 | 61 | 1.55 | 0.174 | 63.19 | 67.5 |
| XT-12 | 43 | 0.94 | 0.208 | 70.16 | 59.21 |
| XT-13 | 99 | 1.63 | 0.104 | 45.04 | 75.31 |
| XT-14 | 33 | 1.37 | 0.201 | 60.56 | 52.6 |
| XT-15 | 35 | 1.87 | 0.083 | 48.67 | 63.5 |
| XT-16 | 87 | 1.61 | 0.113 | 50.17 | 85.4 |
| XT-17 | 49 | 0.95 | 0.18 | 35.94 | 40.9 |
| XT-18 | 27 | 0.74 | 0.114 | 44.57 | 68.9 |
| XT-19 | 56 | 1.29 | 0.165 | 69.83 | 49.6 |
| XT-20 | 79 | 1.64 | 0.214 | 55.07 | 71.6 |
| min | 27 | 0.74 | 0.083 | 35.94 | 40.9 |
| max | 99 | 1.97 | 0.265 | 75.13 | 85.4 |
| mean | 63.05 | 1.43 | 0.16 | 52.77 | 61.47 |
| SD | 19.49 | 0.35 | 0.04 | 12.30 | 11.83 |
| RSD | 0.31 | 0.25 | 0.29 | 0.23 | 0.19 |

S4 The concentrations of heavy metals in the surface soil of the central islet in Wuhai Lake

| NO. | Hg(ng/g) | As（μg/g） | Cd（μg/g） | Cr（μg/g） | Zn（μg/g） |
| --- | --- | --- | --- | --- | --- |
| W-01 | 4 | 2.21 | 0.113 | 57.61 | 56.7 |
| W-02 | 15 | 3.99 | 0.15 | 54.45 | 62.04 |
| W-03 | 10 | 4.96 | 0.134 | 55.34 | 66.73 |
| W-04 | 7 | 3.32 | 0.18 | 63.43 | 58.3 |
| W-05 | 15 | 4.08 | 0.11 | 55.8 | 60.98 |
| W-06 | 14 | 3.75 | 0.16 | 52.04 | 58.41 |
| W-07 | 10 | 4.05 | 0.14 | 49.5 | 50.53 |
| W-08 | 3 | 2.55 | 0.13 | 57 | 70.24 |
| W-09 | 6 | 2.96 | 0.17 | 61.07 | 45.85 |
| W-10 | 14 | 3.53 | 0.15 | 53.8 | 67.84 |
| W-11 | 9 | 4.55 | 0.14 | 65.32 | 56.7 |
| min | 3 | 2.21 | 0.11 | 49.5 | 45.85 |
| max | 15 | 4.96 | 0.18 | 65.32 | 70.24 |
| mean | 9.73 | 3.63 | 0.14 | 56.85 | 59.48 |
| SD | 4.18 | 0.79 | 0.02 | 4.56 | 6.95 |
| RSD | 0.43 | 0.22 | 0.14 | 0.08 | 0.12 |

S5 Classification of the geo - accumulation index ()and the improved Nemerow index ()

| value | value | Classification |
| --- | --- | --- |
| <0 | <0.5 | Not contaminated |
| 0≤<1 | 0.5≤<1 | Uncontaminated to moderately contaminated |
| 1≤<2 | 1≤<2 | Moderately contaminated |
| 2≤<3 | 2≤<3 | Moderate to heavily contaminated |
| 3≤<4 | 3≤<4 | Heavily contaminated |
| 4≤<5 | 4≤<5 | Heavily to extremely contaminated |
| ≥5 | ≥5 | Extremely contaminated |

S6 Potential ecological risk factor () and potential ecological risk index (RI) classification.

| value | Potential risk | RI value | Potential risk |
| --- | --- | --- | --- |
| ≤40 | Low | RI<150 | Low |
| 40≤<80 | Moderate | 150≤RI<300 | Moderate |
| 80≤<160 | Considerable | 300≤RI<600 | Considerable |
| 160≤<320 | High | RI≥600 | Very high |
| ≥320 | Very high |  |  |

S7 The calculation results of the geo-accumulation index and the improved Nemerow index

| NO. | Hg（μg/g） | As（μg/g） | Cd（μg/g） | Cr（μg/g） | Zn（μg/g） |
| --- | --- | --- | --- | --- | --- |
| H-01 | 0.92 | -3.29 | 3.62 | -1.11 | 0.35 |
| H-02 | 1.02 | -2.99 | 3.94 | -1.08 | 0.45 |
| H-03 | 1.18 | -2.39 | 3.97 | -0.98 | 0.54 |
| H-04 | 1.25 | -2.36 | 4.10 | -0.98 | 0.59 |
| H-05 | 1.32 | -2.29 | 4.11 | -0.93 | 0.70 |
| H-06 | 1.48 | -2.27 | 4.16 | -0.84 | 0.75 |
| H-07 | 1.53 | -2.25 | 4.24 | -0.83 | 0.80 |
| H-08 | 1.65 | -2.25 | 4.31 | -0.82 | 0.82 |
| H-09 | 1.72 | -2.22 | 4.32 | -0.81 | 0.95 |
| H-10 | 1.90 | -1.86 | 4.34 | -0.79 | 1.16 |
| H-11 | 2.12 | -1.65 | 4.38 | -0.74 | 1.18 |
| H-12 | 2.16 | -1.63 | 4.46 | -0.68 | 1.20 |
| H-13 | 2.32 | -1.37 | 4.48 | -0.52 | 1.23 |
| H-14 | 2.33 | -1.30 | 4.48 | -0.34 | 1.23 |
| H-15 | 2.39 | -1.18 | 4.56 | -0.30 | 1.34 |
| H-16 | 2.79 | -1.14 | 4.57 | -0.27 | 1.35 |
| H-17 | 2.89 | -1.03 | 4.60 | -0.23 | 1.48 |
| H-18 | 3.02 | -0.98 | 4.66 | -0.21 | 1.48 |
| H-19 | 3.24 | -0.97 | 4.68 | -0.18 | 1.53 |
| H-20 | 3.46 | -0.86 | 4.69 | -0.09 | 1.54 |
| H-21 | 3.49 | -0.63 | 4.71 | -0.09 | 1.57 |
| H-22 | 3.51 | -0.62 | 4.72 | -0.07 | 1.59 |
| H-23 | 3.54 | -0.60 | 4.74 | -0.07 | 1.65 |
| H-24 | 3.54 | -0.53 | 4.79 | -0.06 | 1.65 |
| H-25 | 3.62 | -0.41 | 4.89 | -0.02 | 1.70 |
| H-26 | 3.69 | -0.41 | 5.00 | -0.01 | 1.73 |
| H-27 | 3.73 | -0.39 | 5.05 | 0.00 | 1.74 |
| H-28 | 3.84 | -0.28 | 5.13 | 0.07 | 1.81 |
| H-29 | 4.10 | -0.26 | 5.18 | 0.16 | 1.82 |
| H-30 | 4.13 | -0.19 | 5.23 | 0.30 | 1.91 |
| H-31 | 4.18 | -0.11 | 5.39 | 0.37 | 1.93 |
| H-32 | 4.30 | -0.11 | 5.51 | 0.37 | 2.06 |
| H-33 | 4.30 | 0.07 | 5.63 | 0.39 | 2.07 |
| min | 0.92 | -3.29 | 3.62 | -1.11 | 0.35 |
| max | 4.30 | 0.07 | 5.63 | 0.39 | 2.07 |
| mean | 3.11 | -0.98 | 4.70 | -0.27 | 1.41 |
|  | 1.46 |  | 5.63 |  | 4.12 |
